# Supplementary material for: A free standing porous Co/Mo architecture as a robust bifunctional catalyst toward water splitting
Source: Royal Society of Chemistry journal article supplement (doi:10.1039/c7ra00007c), 2017-01-01
Supplement: c7ra00007c1.pdf [file c7ra00007c1.pdf]

**Electronic Supplementary Information (ESI)**

**Free standing porous Co/Mo architecture as robust bifunctional catalyst  
toward water splitting**

*Yuxuan Li,<sup>b</sup> Xingbo Ge,<sup>a, b\*</sup> Leidanyang Wang,<sup>b</sup> Jia Liu,<sup>b</sup> Yong Wang<sup>b</sup> and Lanxiang Feng<sup>b</sup>*

<sup>a</sup> State Key Laboratory of Oil and Gas Reservoir Geology and Exploitation, Southwest

Petroleum University, Chengdu 610500, P. R. China

<sup>b</sup> The Center of New Energy Materials and Technology, School of Chemistry and Chemical

Engineering, Southwest Petroleum University,

Chengdu 610500, China

\* Corresponding author:

E-mail: [xbge@swpu.edu.cn](mailto:xbge@swpu.edu.cn); Tel: +86-28-83037337; Fax: +86-28-83037337.

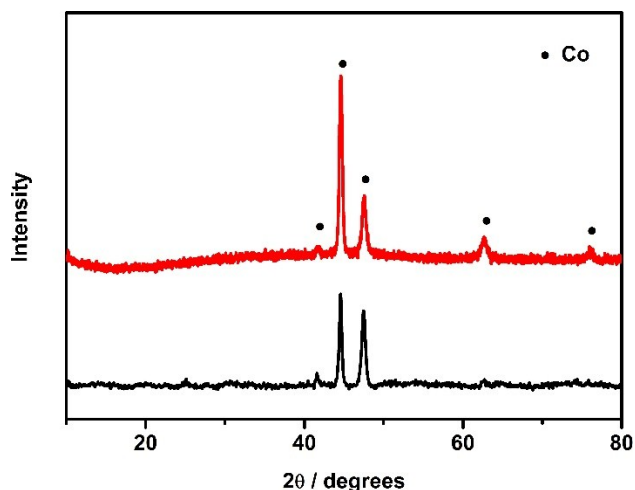

**Figure S1.** X-ray diffraction (XRD) patterns of Co sheet (black) and etched Co (red).

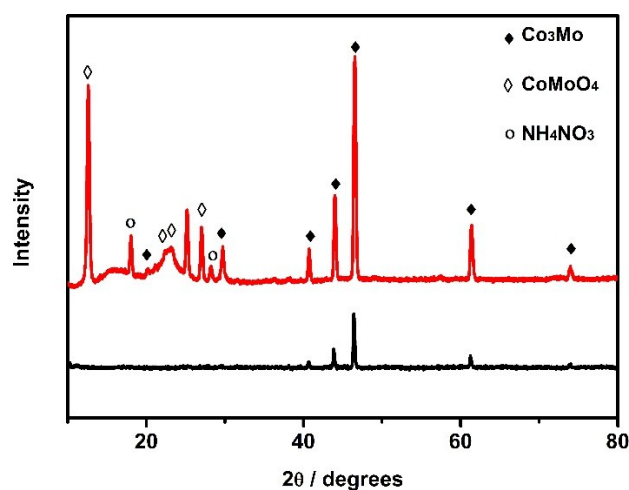

**Figure S2.** X-ray diffraction (XRD) patterns of as-prepared  $\text{Co}_3\text{Mo}$  ribbon (black) and etched Co/Mo (red).

An X-ray diffractometer (PANalytical B.V.), configured with a  $\text{Cu-K}\alpha$  radiation source, graphite monochromator, and scintillation counter, was used to investigate the catalysts' crystalline structures. For etched Co sheet (Figure S1, red), all the detectable diffraction peaks (occur at  $41.7^\circ$ ,  $44.6^\circ$ ,  $47.5^\circ$ ,  $62.7^\circ$ , and  $76.0^\circ$ ) are identical to the reported experimental patterns of hexagonal metallic cobalt (JCPDF 01-089-7373). No clear signal for cobalt oxides is discovered after soaking in CAN according to XRD patterns, suggesting an amorphous  $\text{CoO}_x$  thin film on the etched Co surface. Peaks detected at  $20.2^\circ$ ,  $29.7^\circ$ ,  $40.8^\circ$ ,  $44.0^\circ$ ,  $46.5^\circ$ ,

61.3° and 73.9° for etched Co/Mo could be derived from the hexagonal Co<sub>3</sub>Mo alloy (JCPDF 029-0488), while peaks at 12.6°, 22.5°, 23.3°, 27.0° are assigned to the cobalt molybdenum oxide with the formula of CoMoO<sub>4</sub> or MoO<sub>3</sub>·CoO ((JCPDF 015-0439), indicating that some of the surface atoms of Co<sub>3</sub>Mo have been transformed to oxidation states of Co<sup>II</sup> and Mo<sup>III</sup> respectively. Peaks at 28.2° could be ascribed to the trace amounts of tetragonal ammonium nitrate NH<sub>4</sub>NO<sub>3</sub> (JCPDF 009-0132), which might be originated from Ce(NH<sub>4</sub>)<sub>2</sub>(NO<sub>3</sub>)<sub>6</sub>.

**Table S1.** Comparison of some reported non-noble-metal OER catalysts in basic electrolyte.

| Catalyst                                            | Electrolyte | $\eta_{onset}$ (mV) | $\eta @ 10 \text{ mA cm}^{-2}$ (mV) | Tafel slope (mV dec <sup>-1</sup> ) | Ref.      |
|-----------------------------------------------------|-------------|---------------------|-------------------------------------|-------------------------------------|-----------|
| etched Co/Mo                                        | 0.1 M KOH   | 270                 | 470                                 | 123                                 | this work |
| Co <sub>3</sub> Mo                                  | 0.1 M KOH   | 340                 | 530                                 | 87                                  | this work |
| etched Co                                           | 0.1 M KOH   | 311                 | N/A                                 | 132                                 | this work |
| Co sheet                                            | 0.1 M KOH   | 356                 | N/A                                 | 113                                 | this work |
| NA-NiCo <sub>2</sub> O <sub>4</sub>                 | 1 M NaOH    | N/A                 | 458                                 | 52                                  | [1]       |
| Ni(OH) <sub>2</sub>                                 | 0.1 M KOH   | 350                 | 595                                 | 165                                 | [2]       |
| MWCNTs + Ni(OH) <sub>2</sub>                        | 0.1 M KOH   | 337                 | 540                                 | 140                                 | [2]       |
| MWCNTs/Ni(OH) <sub>2</sub>                          | 0.1 M KOH   | 322                 | 474                                 | 87                                  | [2]       |
| <i>meso</i> Co <sub>3</sub> O <sub>4</sub> -35      | 0.1 M KOH   | N/A                 | 636                                 | N/A                                 | [3]       |
| <i>meso</i> Co <sub>3</sub> O <sub>4</sub> -100     | 0.1 M KOH   | N/A                 | 525                                 | N/A                                 | [3]       |
| Fe-doped <i>meso</i> Co <sub>3</sub> O <sub>4</sub> | 0.1 M KOH   | N/A                 | 486                                 | N/A                                 | [4]       |

**Table S2.** Comparison of some reported Pt-free HER catalysts in basic electrolyte.

| Catalyst                         | Electrolyte | $\eta_{onset}$<br>(mV) | $\eta @ 10 \text{ mA}$<br>$\text{cm}^{-2}$<br>(mV) | Tafel slope<br>( $\text{mV dec}^{-1}$ ) | Ref.      |
|----------------------------------|-------------|------------------------|----------------------------------------------------|-----------------------------------------|-----------|
| etched Co/Mo                     | 1 M KOH     | 90                     | 240                                                | 139                                     | this work |
| Co <sub>3</sub> Mo               | 1 M KOH     | 256                    | 340                                                | 105                                     | this work |
| Mo sheet                         | 1 M KOH     | 260                    | 370                                                | 97                                      | this work |
| Ni wire                          | 1 M NaOH    | N/A                    | 350                                                | N/A                                     | [6]       |
| Ni/Ti                            | 1 M NaOH    | N/A                    | 220                                                | N/A                                     | [6]       |
| Co-P compact film                | 1 M KOH     | N/A                    | >400                                               | N/A                                     | [7]       |
| porous Co-P/Co-PO <sub>4</sub>   | 1 M KOH     | N/A                    | 380                                                | N/A                                     | [7]       |
| Ni-P                             | 1 M NaOH    | N/A                    | >300                                               | 125                                     | [10]      |
| Ni(OH) <sub>2</sub> /NF          | 1 M NaOH    | 120                    | 250                                                | N/A                                     | [14]      |
| MoB                              | 1 M KOH     | 140                    | 220                                                | 59                                      | [11]      |
| CoO <sub>x</sub> @CN             | 1 M KOH     | 85                     | 232                                                | 115                                     | [13]      |
| Mo <sub>2</sub> C                | 1 M KOH     | 140                    | 270                                                | 78                                      | [15]      |
| WN nanorod array                 | 1 M KOH     | 200                    | 285                                                | 170                                     | [16]      |
| NiMo <sub>3</sub> S <sub>4</sub> | 0.1 M KOH   | 59                     | 257                                                | 98                                      | [12]      |

**Table S3.** Comparison of some reported Pt-free HER catalysts in acidic electrolyte.

| Catalyst                                           | Electrolyte                          | $\eta_{onset}$<br>(mV) | $\eta @ 10 \text{ mA cm}^{-2}$<br>(mV) | Tafel slope<br>(mV dec <sup>-1</sup> ) | Ref.      |
|----------------------------------------------------|--------------------------------------|------------------------|----------------------------------------|----------------------------------------|-----------|
| etched Co/Mo                                       | 0.5 M H <sub>2</sub> SO <sub>4</sub> | 109                    | 220                                    | 71                                     | this work |
| Co <sub>3</sub> Mo                                 | 0.5 M H <sub>2</sub> SO <sub>4</sub> | 130                    | 390                                    | 113                                    | this work |
| Mo sheet                                           | 0.5 M H <sub>2</sub> SO <sub>4</sub> | 240                    | N/A                                    | 76                                     | this work |
| Co-NRCNTs                                          | 0.5 M H <sub>2</sub> SO <sub>4</sub> | N/A                    | 260                                    | 69                                     | [5]       |
| C <sub>3</sub> N <sub>4</sub> @NG                  | 0.5 M H <sub>2</sub> SO <sub>4</sub> | N/A                    | 240                                    | 52                                     | [8]       |
| NENU-500                                           | 0.5 M H <sub>2</sub> SO <sub>4</sub> | 180                    | 237                                    | 96                                     | [9]       |
| MoO <sub>3</sub> -MoS <sub>2</sub>                 | 1.0 M H <sub>2</sub> SO <sub>4</sub> | 150-200                | 300                                    | 50-60                                  | [17]      |
| MoS <sub>2</sub> NF/GR                             | 0.5 M H <sub>2</sub> SO <sub>4</sub> | 190                    | N/A                                    | 95                                     | [18]      |
| MoS <sub>2</sub> AG/rGO                            | 0.5 M H <sub>2</sub> SO <sub>4</sub> | 290                    | N/A                                    | 102                                    | [23]      |
| MoN/C                                              | 0.5 M H <sub>2</sub> SO <sub>4</sub> | 157                    | N/A                                    | 55                                     | [19]      |
| MoS <sub>2</sub> /CNT-GR                           | 0.5 M H <sub>2</sub> SO <sub>4</sub> | 140                    | 255                                    | 100                                    | [20]      |
| Mo <sub>2</sub> N/CNT-GR                           | 0.5 M H <sub>2</sub> SO <sub>4</sub> | 118                    | 186                                    | 72                                     | [20]      |
| MoS <sub>2</sub> /Mo                               | 0.5 M H <sub>2</sub> SO <sub>4</sub> | 150-200                | ~280-290                               | 50-72                                  | [21]      |
| MoS <sub>2</sub> /MoO <sub>2</sub>                 | 0.5 M H <sub>2</sub> SO <sub>4</sub> | 104                    | 240                                    | 76.1                                   | [22]      |
| [Mo <sub>3</sub> S <sub>4</sub> ] <sup>4+</sup>    | 0.5 M H <sub>2</sub> SO <sub>4</sub> | 150                    | 280                                    | 120                                    | [23]      |
| MoS <sub>2</sub> NS/GR                             | 0.5 M H <sub>2</sub> SO <sub>4</sub> | ~140                   | N/A                                    | 41                                     | [24]      |
| exfoliated WS <sub>2</sub>                         | 0.5 M H <sub>2</sub> SO <sub>4</sub> | 280                    | N/A                                    | 110                                    | [25]      |
| MoS <sub>2</sub>                                   | 0.5 M H <sub>2</sub> SO <sub>4</sub> | 180                    | 270                                    | 50                                     | [26]      |
| Co <sub>0.6</sub> Mo <sub>1.4</sub> N <sub>2</sub> | 0.1 M HClO <sub>4</sub>              | N/A                    | 200                                    | N/A                                    | [27]      |

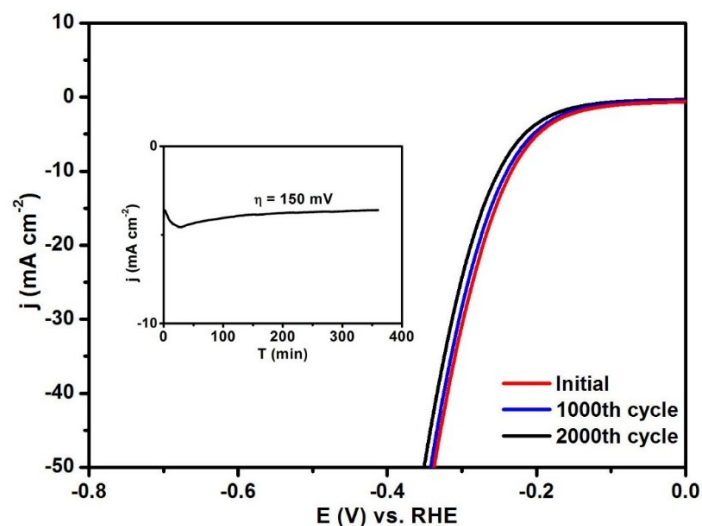

**Figure S3.** HER polarization curves of the etched Co/Mo before and after 1000 and 2000 cycles in 1 M KOH. Inset is the chronopotentiometry curve of the etched Co/Mo at an overpotential of 150 mV.

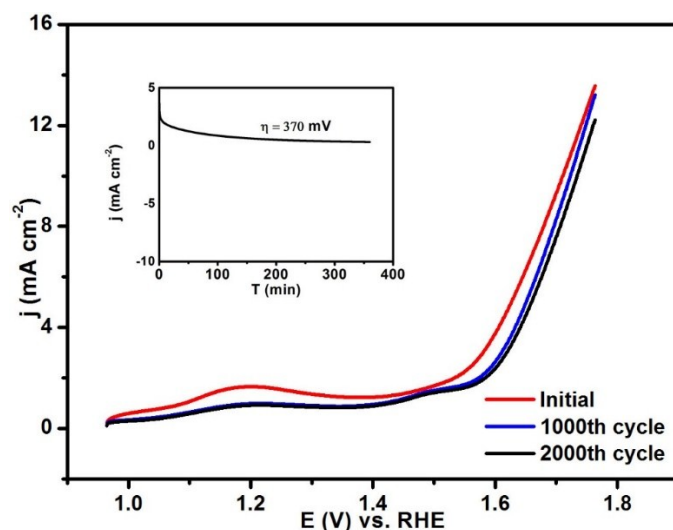

**Figure S4.** OER polarization curves of the etched Co/Mo before and after 1000 and 2000 cycles in 0.1 M KOH. Inset is the chronopotentiometry curve of the etched Co/Mo at 1.60 V vs. RHE.

## References

- [1] J. Wang, T. Qiu, X. Chen, Y. Lu, W. Yang, *J. Power Sources*, 2014, **268**, 341-348.
- [2] X. Zhou, Z. Zhang, Y. Ma, Y. Qu, *J. Mater. Chem. A*, 2014, **2**, 11799-11806.
- [3] H. Tüysüz, Y. J. Hwang, S. B. Khan, A. M. Asiri, P. Yang, *Nano Res.*, 2013, **6(1)**, 47-54.
- [4] T. Grewe, X. Deng, H. Tüysüz, *Chem. Mater.* 2014, **26**, 3162-3168.
- [5] X. Zou, X. Huang, A. Goswami, R. Silva, B. R. Sathe, *Angew. Chem. Int. Ed.* 2014, **53**, 4372-4376.
- [6] J. R. McKone, B. F. Sadtler, C. A. Werlang, N. S. Lewis, H. B. Gray, *ACS Catal.*, 2013, **3**, 166-169.
- [7] Y. Yang, H. Fei, G. Ruan, J. M. Tour, *Adv. Mater.*, 2015, **27**, 3175-3180.
- [8] Y. Zheng, Y. Jiao, Y. Zhu, L. H. Li, Y. Han, Y. Chen, A. Du, M. Jaroniec, S. Z. Qiao, *Nat. Commun.* 2014, **5**, 3783-3790.
- [9] J. Qin, D. Du, W. Guan, X. Bo, Y. Li, L. Guo, Z. Su, Y. Wang, Y. Lan, H. Zhou, *J. Am. Chem. Soc.*, 2015, **137**, 7169-7177.
- [10] L. Wan, J. Zhang, Y. Chen, C. Zhong, W. Hu, Y. Deng, *J. Mater. Sci.*, 2017, **52**, 804-814.
- [11] H. Vrubel, X. Hu, *Angew. Chem. Int. Ed.*, 2012, **51**, 12703-12706.
- [12] J. Jiang, M. Gao, W. Sheng, Y. Yan, *Angew. Chem. Int. Ed.*, 2016, **55**, 15240-15245.
- [13] H. Jin, J. Wang, D. Su, Z. Wei, Z. Pang, Y. Wang, *J. Am. Chem. Soc.*, 2015, **137**, 2688-2694.
- [14] J. Luo, J. H. Im, M. T. Mayer, M. Schreier, M. K. Nazeeruddin, N. G. Park, S. D. Tilley, H. J. Fan, M. Grätzel, *Science*, **345**, 1593-1596.
- [15] C. G. Morales-Guio, K. Thorwarth, B. Niesen, L. Liardet, J. Patscheider, C. Ballif, X. Hu, *J. Am. Chem. Soc.*, 2015, **137**, 7035-7038.
- [16] J. Shi, Z. Pu, Q. Liu, A. M. Asiri, J. Hu, X. Sun, *Electrochim. Acta*, 2015, **154**, 345-351.
- [17] Z. Chen, D. Cummins, B. N. Reinecke, E. Clark, M. K. Sunkara, T. F. Jaramillo, *Nano Lett.*, 2011, **11**, 4168-4175.
- [18] C. Ma, X. Qi, B. Chen, S. Bao, Z. Yin, X. Wu, Z. Luo, J. Wei, H. Zhang, H. Zhang, *Nanoscale*, 2014, **6**, 5624-5629.
- [19] W. Chen, K. Sasaki, C. Ma, A. I. Frenkel, N. Marinkovic, J. T. Muckerman, Y. Zhu, R. R. Adzic, *Angew. Chem. Int. Ed.*, 2012, **51**, 6131-6135.
- [20] D. H. Youn, S. Han, J. Y. Kim, J. Y. Kim, H. Park, S. H. Choi, J. S. Lee, *ACS Nano*, 2014, **8**, 5164-517.
- [21] Y. Yang, H. Fei, G. Ruan, C. Xiang, J. M. Tour, *Adv. Mater.*, 2014, **26**, 8163-8168.
- [22] L. Yang, W. Zhou, D. Hou, K. Zhou, G. Li, Z. Tang, L. Lia, S. Chen, *Nanoscale*, 2015, **7**, 5203-5208.

- [23] T. F. Jaramillo, J. Bonde, J. Zhang, Bee-Lean Ooi, K. Andersson, J. Ulstrup, I. Chorkendorff, *J. Phys. Chem. C*, 2008, **112**, 17492-17498.
- [24] X. Zheng, J. Xu, K. Yan, H. Wang, Z. Wang, S. Yang, *Chem. Mater.*, 2014, **26**, 2344-2353.
- [25] J. Kim, S. Byun, A. J. Smith, J. Yu, J. Huang, *J. Phy. Chem. Lett.*, 2013, **4**, 1227-1232.
- [26] J. Kibsgaard, Z. Chen, B. N. Reinecke, T. F. Jaramillo, *Nat. Mater.*, 2012, **11**, 963-969.
- [27] B. Cao, G. M. Veith, J. C. Neuefeind, R. R. Adzic, P. G. Khalifah, *J. Am. Chem. Soc.*, 2013, **135**, 19186-19192.
